# Supplementary material
Source: PubMed Central journal article supplement (PMC9085721)
Supplement: RA-008-C8RA06712K-s001.pdf [file RA-008-C8RA06712K-s001.pdf]

## **Speciation of Lanthanide Ions in the Organic Phase after Extraction from Nitrate Media by**

### **Basic Extractants**

Bieke Onghena,<sup>a</sup> Eleonora Papagni,<sup>a</sup> Ernesto Rezende Souza,<sup>a</sup> Dipanjan, Banerjee,<sup>a</sup> Koen

Binnemans,<sup>a,\*</sup> and Tom Vander Hoogerstraete.<sup>a</sup>

<sup>a</sup>KU Leuven – University of Leuven, Department of Chemistry, Celestijnenlaan 200F, bus 2402,

B-3001 Heverlee (Belgium)

### **Supplementary information**

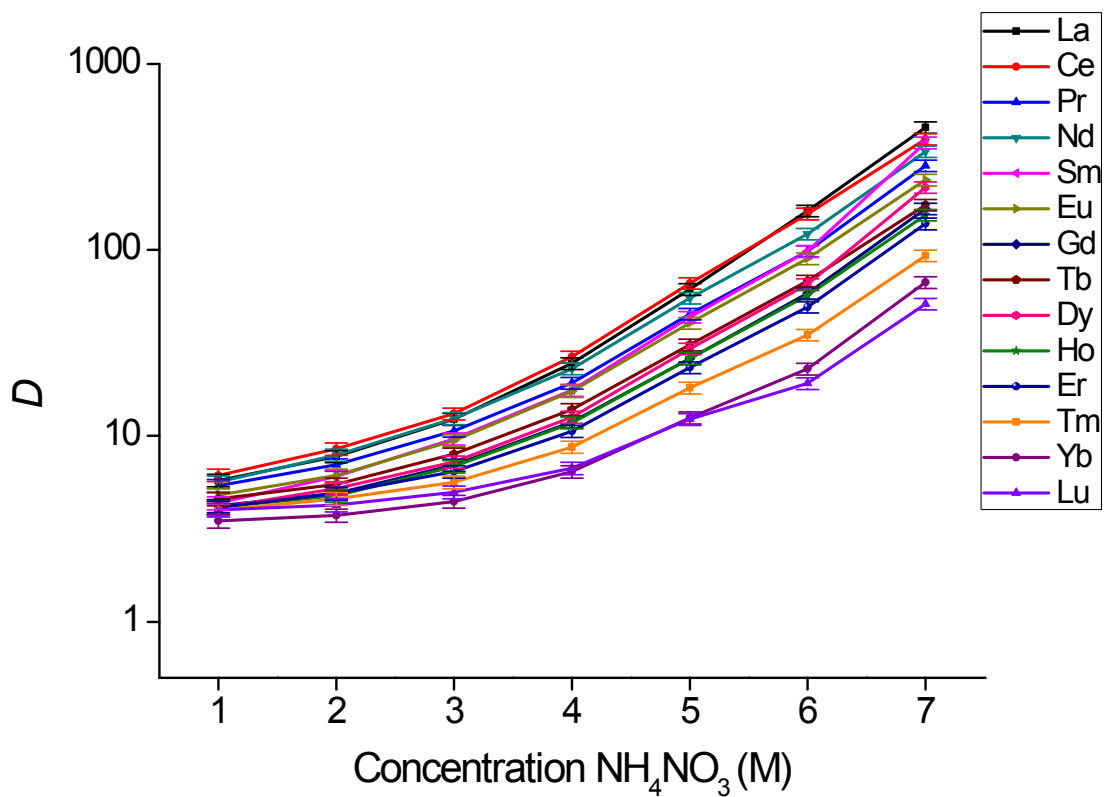

Figure S1: Distribution ratio  $D$  for the extraction of lanthanide ions with trihexyl(tetradecyl)phosphonium nitrate as a function of the concentration of  $\text{NH}_4\text{NO}_3$  in the aqueous phase.  $[\text{Ln}^{3+}]_{\text{aq,in}} = 0.01 \text{ mol L}^{-1}$ .

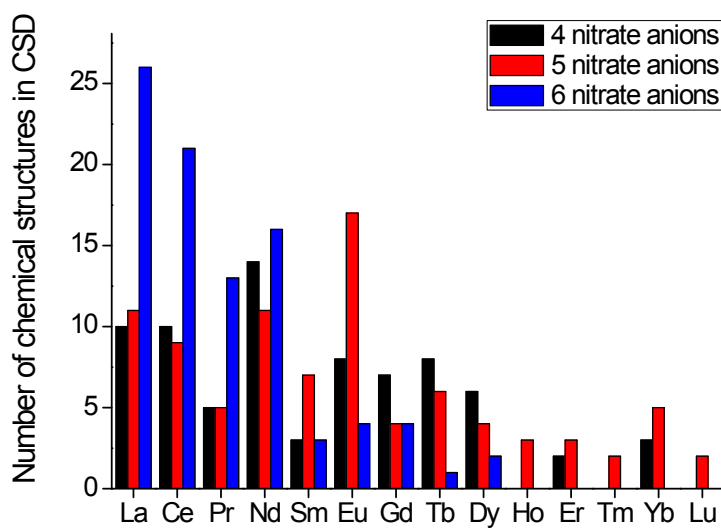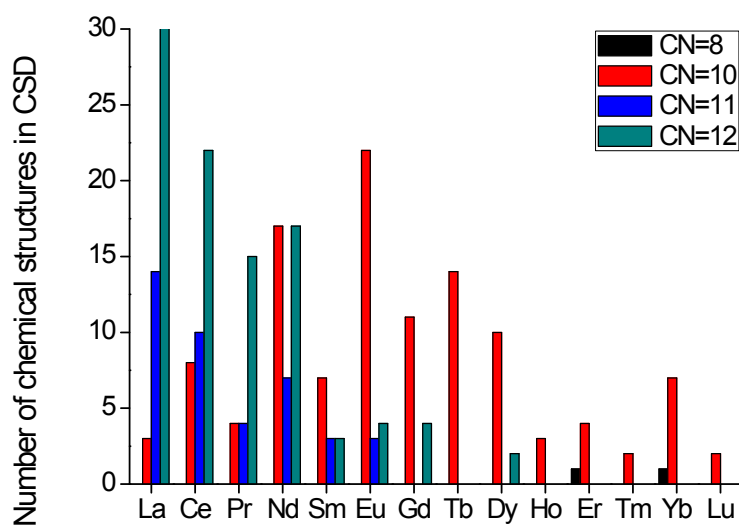

Figure S2: Systematic overview of the number of crystal structures of trivalent lanthanide complexes in the Cambridge Structural Database with (a) 4, 5 or 6 coordinating bidentate nitrate ligands, and (b) with a coordination number (CN) of 8, 10, 11 or 12.

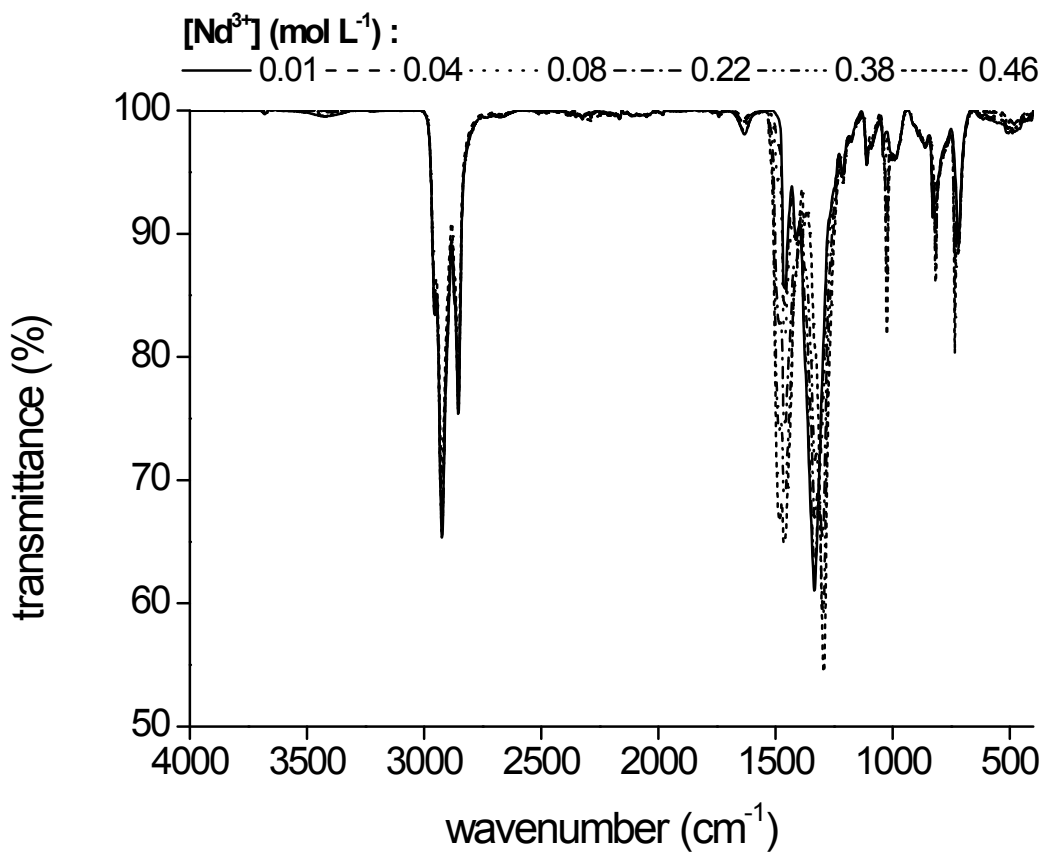

Figure S3. FTIR spectra of the trihexyl(tetradecyl)phosphonium nitrate phase after extraction of increasing concentrations of  $\text{Nd}^{3+}$  from nitrate solution.

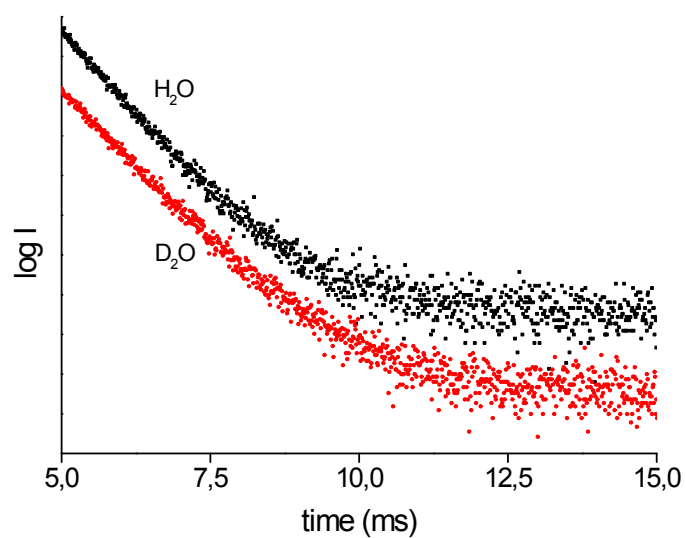

Figure S4. Luminescence decay curves of  $\text{Eu}^{3+}$  ( $0.05 \text{ mol L}^{-1}$ ) extracted to trihexyl(tetradecyl)phosphonium nitrate in  $\text{H}_2\text{O}$  and  $\text{D}_2\text{O}$ .

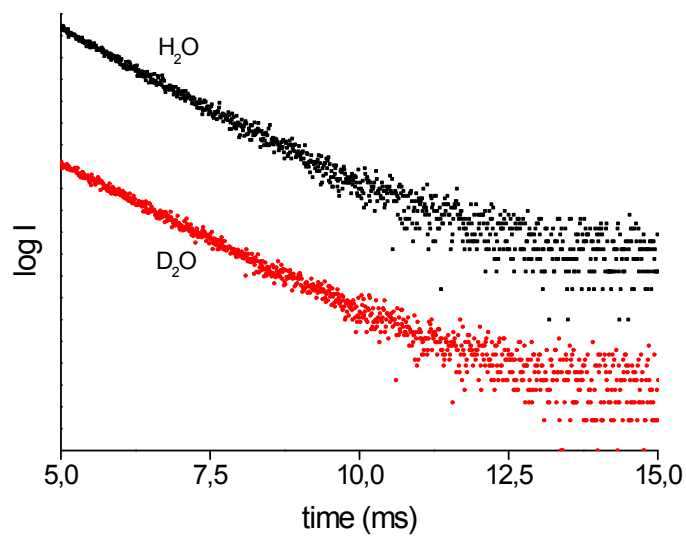

Figure S5. Luminescence decay curves of  $\text{Tb}^{3+}$  ( $0.05 \text{ mol L}^{-1}$ ) extracted to trihexyl(tetradecyl)phosphonium nitrate in  $\text{H}_2\text{O}$  and  $\text{D}_2\text{O}$ .

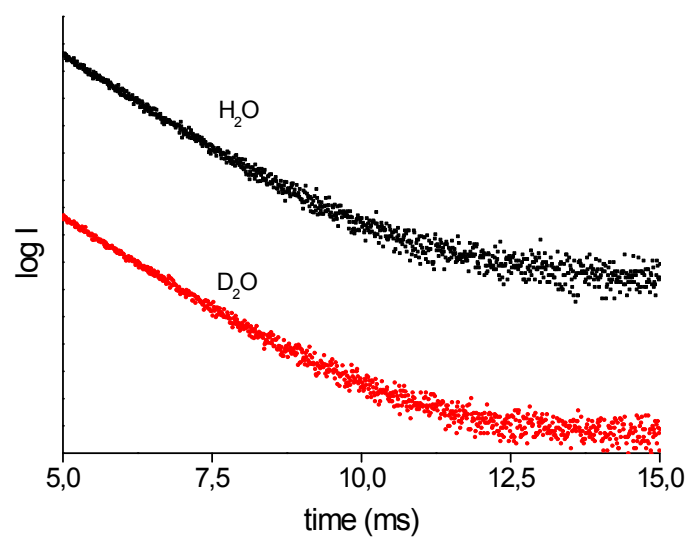

Figure S6: Luminescence decay curves of  $\text{Tb}^{3+}$  ( $0.5 \text{ mol L}^{-1}$ ) extracted to trihexyl(tetradecyl)phosphonium nitrate in  $\text{H}_2\text{O}$  and  $\text{D}_2\text{O}$ .

Table S1. Elemental analysis of trihexyl(tetradecyl)phosphonium nitrate, after full loading by extraction of various lanthanides from a 3.5 M Ca(NO<sub>3</sub>)<sub>2</sub> solution (4:1 A/O phase ratio, [Ln<sup>3+</sup>]<sub>aq,in</sub> = 0.5 mol L<sup>-1</sup>).

| theoretical [P <sub>66614</sub> ] <sub>2</sub> [Ln(NO <sub>3</sub> ) <sub>5</sub> ] |       |      |      |                      |      | theoretical [P <sub>66614</sub> ] <sub>3</sub> [Ln(NO <sub>3</sub> ) <sub>6</sub> ] |       |      |      |                      | experimental |      |      |      |                      |
|-------------------------------------------------------------------------------------|-------|------|------|----------------------|------|-------------------------------------------------------------------------------------|-------|------|------|----------------------|--------------|------|------|------|----------------------|
| C                                                                                   | H     | N    | P/Ln | [Ln] <sub>org</sub>  |      | C                                                                                   | H     | N    | P/Ln | [Ln] <sub>org</sub>  | C            | H    | N    | P/Ln | [Ln] <sub>org</sub>  |
| wt%                                                                                 | wt%   | wt%  |      | mol kg <sup>-1</sup> |      | wt%                                                                                 | wt%   | wt%  |      | mol kg <sup>-1</sup> | wt%          | wt%  | wt%  |      | mol·kg <sup>-1</sup> |
| La                                                                                  | 54.26 | 9.68 | 4.94 | 2                    | 0.71 | 58.75                                                                               | 10.48 | 4.28 | 3    | 0.51                 | 56.86        | 9.76 | 4.45 | 2.7  | 0.527 ± 0.005        |
| Pr                                                                                  | 54.18 | 9.66 | 4.94 | 2                    | 0.70 | 58.69                                                                               | 10.47 | 4.28 | 3    | 0.51                 | 55.53        | 9.85 | 4.55 | 2.3  | 0.593 ± 0.007        |
| Nd                                                                                  | 54.06 | 9.64 | 4.93 | 2                    | 0.70 | 58.59                                                                               | 10.45 | 4.27 | 3    | 0.51                 | 55.86        | 9.89 | 4.61 | 2.1  | 0.650 ± 0.011        |
| Eu                                                                                  | 53.77 | 9.59 | 4.9  | 2                    | 0.70 | 58.37                                                                               | 10.41 | 4.25 | 3    | 0.51                 | 54.54        | 9.48 | 4.80 | 1.9  | 0.616 ± 0.008        |
| Ho                                                                                  | 53.28 | 9.50 | 4.85 | 2                    | 0.69 | 57.98                                                                               | 10.34 | 4.23 | 3    | 0.50                 | 54.04        | 9.58 | 4.49 | 2.2  | 0.688 ± 0.011        |
| Er                                                                                  | 53.20 | 9.49 | 4.85 | 2                    | 0.69 | 57.92                                                                               | 10.33 | 4.22 | 3    | 0.50                 | 53.76        | 9.54 | 4.78 | 1.7  | 0.789 ± 0.022        |
| Lu                                                                                  | 52.91 | 9.44 | 4.82 | 2                    | 0.69 | 57.69                                                                               | 10.29 | 4.20 | 3    | 0.50                 | 55.58        | 9.84 | 4.47 | 1.8  | 0.758 ± 0.003        |

Table S2. EXAFS fitting results of the  $[\text{Ln}(\text{NO}_3)_5]^{2-}$  complex extracted to the organic phase.

|     | Ln-O <sub>c</sub> |           |                                  | Ln-N     |           |                                  |
|-----|-------------------|-----------|----------------------------------|----------|-----------|----------------------------------|
|     | N                 | r (Å)     | σ <sup>2</sup> (Å <sup>2</sup> ) | N        | r (Å)     | σ <sup>2</sup> (Å <sup>2</sup> ) |
| La* | 11.6(10)          | 2.606(11) | 0.013(1)                         | 5.8(1.0) | 3.044(11) | 0.010(2)                         |
| Ce* | 9.9(6)            | 2.549(8)  | 0.011(1)                         | 4.9(6)   | 2.988(6)  | 0.007(1)                         |
| Nd  | 11.7(10)          | 2.544(14) | 0.012(2)                         | 5.8(1.0) | 3.008(31) | 0.016(6)                         |
| Sm  | 12.6(3)           | 2.504(4)  | 0.013(1)                         | 6.3(3)   | 2.939(8)  | 0.011(1)                         |
| Eu  | 12.3(13)          | 2.500(10) | 0.012(1)                         | 6.1(1.3) | 2.939(15) | 0.013(2)                         |
| Gd  | 10.8(9)           | 2.472(6)  | 0.012(1)                         | 5.4(9)   | 2.928(8)  | 0.009(1)                         |
| Tb  | 10.0(9)           | 2.454(7)  | 0.011(1)                         | 5.0(9)   | 2.911(9)  | 0.008(1)                         |
| Dy  | 9.9(9)            | 2.433(7)  | 0.010(1)                         | 5.0(9)   | 2.897(8)  | 0.007(1)                         |
| Ho  | 10.1(9)           | 2.431(7)  | 0.012(1)                         | 5.0(9)   | 2.885(8)  | 0.008(1)                         |
| Er  | 9.8(9)            | 2.432(7)  | 0.011(1)                         | 4.9(9)   | 2.889(8)  | 0.008(1)                         |
| Tm  | 9.8(9)            | 2.401(7)  | 0.011(1)                         | 4.9(9)   | 2.861(8)  | 0.007(1)                         |
| Yb  | 10.0(6)           | 2.389(8)  | 0.011(1)                         | 5.0(6)   | 2.853(8)  | 0.007(1)                         |
| Lu  | 10.1(3)           | 2.382(6)  | 0.011(1)                         | 5.0(3)   | 2.850(7)  | 0.007(1)                         |

\* recorded on the K-line



Table S3. Comparison between the experimental Ln-O<sub>c</sub> and Ln-N distances and literature data of Ln(NO<sub>3</sub>)<sub>5</sub><sup>2-</sup> and Ln(NO<sub>3</sub>)<sub>6</sub><sup>3-</sup> crystal structures.

|     | Ln-O <sub>c</sub> |                                                            |             |                                                            | Ln-N        |           |                                                            |             |                                                            |             | Ref   |
|-----|-------------------|------------------------------------------------------------|-------------|------------------------------------------------------------|-------------|-----------|------------------------------------------------------------|-------------|------------------------------------------------------------|-------------|-------|
|     | EXAFS             | Literature Ln(NO <sub>3</sub> ) <sub>5</sub> <sup>2-</sup> |             | Literature Ln(NO <sub>3</sub> ) <sub>6</sub> <sup>3-</sup> |             | r (Å)     | Literature Ln(NO <sub>3</sub> ) <sub>5</sub> <sup>2-</sup> |             | Literature Ln(NO <sub>3</sub> ) <sub>6</sub> <sup>3-</sup> |             |       |
|     |                   | average                                                    | stdev       | average                                                    | stdev       |           | average                                                    | stdev       | average                                                    | stdev       |       |
| La* | 2.606(11)         | <i>n.a.</i>                                                | <i>n.a.</i> | 2.654                                                      | 0.015       | 3.044(11) | <i>n.a.</i>                                                | <i>n.a.</i> | 3.028                                                      | 0.022       | 1     |
| Ce* | 2.549(8)          | 2.565                                                      | 0.015       | 2.636                                                      | 0.023       | 2.988(6)  | 2.972                                                      | 0.026       | 3.060                                                      | 0.008       | 2-3   |
| Nd  | 2.544(14)         | 2.537                                                      | 0.028       | 2.613                                                      | 0.024       | 3.008(31) | 3.023                                                      | 0.095       | 3.029                                                      | 0.010       | 4-5   |
| Sm  | 2.504(4)          | 2.500                                                      | 0.033       | 2.580                                                      | 0.027       | 2.939(8)  | 2.930                                                      | 0.027       | 3.002                                                      | 0.014       | 5-6   |
| Eu  | 2.500(10)         | 2.481                                                      | 0.031       | 2.593                                                      | 0.018       | 2.939(15) | 2.929                                                      | 0.011       | 3.008                                                      | 0.000       | 7-8   |
| Gd  | 2.472(6)          | 2.467                                                      | 0.033       | 2.565                                                      | 0.026       | 2.928(8)  | 2.882                                                      | 0.022       | 2.987                                                      | 0.015       | 9-10  |
| Tb  | 2.454(7)          | 2.448                                                      | 0.034       | 2.558                                                      | 0.029       | 2.911(9)  | 2.878                                                      | 0.021       | 2.978                                                      | 0.014       | 11-12 |
| Dy  | 2.433(7)          | 2.437                                                      | 0.037       | 2.548                                                      | 0.008       | 2.897(8)  | 2.867                                                      | 0.027       | 2.971                                                      | 0.000       | 11 13 |
| Ho  | 2.431(7)          | 2.434                                                      | 0.030       | <i>n.a.</i>                                                | <i>n.a.</i> | 2.885(8)  | 2.880                                                      | 0.014       | <i>n.a.</i>                                                | <i>n.a.</i> | 5     |
| Er  | 2.432(7)          | 2.416                                                      | 0.034       | <i>n.a.</i>                                                | <i>n.a.</i> | 2.889(8)  | 2.865                                                      | 0.022       | <i>n.a.</i>                                                | <i>n.a.</i> | 5     |
| Tm  | 2.401(7)          | 2.405                                                      | 0.046       | <i>n.a.</i>                                                | <i>n.a.</i> | 2.861(8)  | 2.822                                                      | 0.020       | <i>n.a.</i>                                                | <i>n.a.</i> | 5     |
| Yb  | 2.389(8)          | 2.399                                                      | 0.032       | <i>n.a.</i>                                                | <i>n.a.</i> | 2.853(8)  | 2.868                                                      | 0.028       | <i>n.a.</i>                                                | <i>n.a.</i> | 5     |
| Lu  | 2.382(6)          | 2.370                                                      | 0.042       | <i>n.a.</i>                                                | <i>n.a.</i> | 2.850(7)  | 2.813                                                      | 0.041       | <i>n.a.</i>                                                | <i>n.a.</i> | 5     |

\* recorded on the K-line

## REFERENCES

1. Yan, C.; Zhang, Y.; Gao, S.; Li, B.; Huang, C.; Xu, G., Synthesis and structure of tributylammonium hexanitrate lanthanum. *J. Alloys Compd.* **1995**, *225* (1), 385-389.
2. Al-Karaghoul, A. R.; Wood, J. S., Crystal and molecular structure of bistrisphenyl(ethyl)phosphonium pentanitratocerium(III). *J. Chem. Soc., Dalton Trans.* **1973**, (21), 2318-2321.
3. Cambridge Structural Database: CCDC1419654.
4. Huang, C.; Li, B.; Yang, Q.; Tian, S.; Xu, G., *Acta Sci. Nat. Univ. Pek.* **1984**, 45-5.
5. Cui, H.; Otsuka, T.; Kobayashi, A.; Takeda, N.; Ishikawa, M.; Misaki, Y.; Kobayashi, H., Structural, Electrical, and Magnetic Properties of a Series of Molecular Conductors Based on BDT-TTP and Lanthanoid Nitrate Complex Anions (BDT-TTP = 2,5-Bis(1,3-dithiol-2-ylidene)-1,3,4,6-tetrathiapentalene). *Inorg. Chem.* **2003**, *42* (19), 6114-6122.
6. Tang, N.; Zhao, Y.; He, L.; Yuan, W.-L.; Tao, G.-H., Long-lived luminescent soft materials of hexanitratosamarate(III) complexes with orange visible emission. *Dalton Trans.* **2015**, *44* (19), 8816-8823.
7. Zhao, Y.; He, L.; Tang, N.; Qin, S.; Tao, G.-H.; Liang, F.-X., Structures and Properties of Luminescent Pentanitratoeuropate(III) Ionic Liquids. *Eur. J. Inorg. Chem.* **2015**, *2015* (3), 542-551.
8. Zhang, L.; Zhou, Y.; Xu, L.; Yu, Z.; Razak, I. A.; Chantrapromma, S.; Fun, H.-K.; You, X., Synthesis, molecular structure and fluorescence of an organic-inorganic hybrid complex  $[\text{Eu}(\text{NO}_3)_6][(\text{Hphen})_6 \cdot (\text{NO}_3)_2] \cdot \text{NO}_3$  (phen=1,10-phenanthroline). *Inorg. Chem. Commun.* **2001**, *4* (7), 368-371.

9. Kawasaki, T.; Okumura, S.; Sasaki, Y.; Ikeda, Y., Crystal Structures of Ln(III) (Ln = La, Pr, Nd, Sm, Eu, and Gd) Complexes with N,N,N',N'-Tetraethyldiglycolamide Associated with Homoleptic  $[\text{Ln}(\text{NO}_3)_6]^{3-}$ . *Bull. Chem. Soc. Jpn.* **2013**, *87* (2), 294-300.
10. Cambridge Structural Database: CCDC248070.
11. Zhang, S.-Y.; Liao, J.-S.; Xu, W.-J.; Liang, F.-Y.; Peng, G.-H.; Liu, S.-J.; Wen, H.-R.; Du, Z.-Y., Structural phase transitions, dielectric bistability and luminescence of two bulky ion-pair crystals  $[\text{N}(\text{C}_3\text{H}_7)_4]_2[\text{Ln}(\text{NO}_3)_5]$  (Ln = Tb, Dy). *New J. Chem.* **2017**, *41* (18), 9963-9968.
12. del C. Fernández-Fernández, M.; Bastida, R.; Macías, A.; Pérez-Lourido, P.; Platas-Iglesias, C.; Valencia, L., Lanthanide(III) Complexes with a Tetrapyridine Pendant-Armed Macrocyclic Ligand:  $^1\text{H}$  NMR Structural Determination in Solution, X-ray Diffraction, and Density-Functional Theory Calculations. *Inorg. Chem.* **2006**, *45* (11), 4484-4496.
13. Cambridge Structural Database: CCDC833599.
